# Supplementary material
Source: MDPI journal article supplement (https://www.mdpi.com/2813-2203/1/2/14)
Supplement: s1 [file s1]

# Supporting Information for “Use Internet Search Data to Forecast COVID-19 Situation: A Systematic Review”

Simin Ma <sup>1</sup>, Yan Sun <sup>1</sup> and Shihao Yang <sup>1,\*</sup>

<sup>1</sup> H. Milton Stewart School of Industrial and Systems Engineering, Georgia Institute of Technology

\* Correspondence: shihao.yang@isye.gatech.edu

## 1. Sample Dataset Showcase

### 1.1 COVID-19 Related Data Showcase

This section showcases the COVID-19 related data discussed in section 3.1. Table S1 displays COVID-19 new case and death counts in daily frequencies for a few example countries and example dates. Here, we use the raw data from JHU CSSE COVID-19 dataset [57]. As an example, “standing on” 2022-08-07, to produce 1-4 weeks ahead forecasts (2022-08-08 to 2022-09-04), one can use COVID-19 cases and deaths information up to 2022-08-07.

Table S2 showcases the COVID-19 daily new hospital admissions (hospitalization) in United States, which is obtained from U.S. Department of Health and Human Services (HHS) [60]. Other countries’ hospitalization data follows the same structure. However, the data source for difference countries varies.

**Table S1.** Example COVID-19 new cases and deaths dataset. The included countries are considered in the forecasting studies in Table 1. All other countries’ cases and deaths data follow the same structure as shown in Table S1. The dataset source is JHU CSSE COVI-19 dataset [57].

| Date       | COVID-19 Data | Countries |       |      |       |               |                |     |
|------------|---------------|-----------|-------|------|-------|---------------|----------------|-----|
|            |               | China     | India | Iran | Italy | United States | United Kingdom | ... |
| 2020-03-28 | New Cases     | 56        | 100   | 3076 | 5974  | 22164         | 2822           | ... |
|            | New Deaths    | 3         | 4     | 139  | 889   | 713           | 516            | ... |
| 2020-03-29 | New Cases     | 43        | 37    | 2901 | 5217  | 16127         | 2857           | ... |
|            | New Deaths    | 5         | 3     | 123  | 756   | 555           | 586            | ... |
| 2020-03-30 | New Cases     | 34        | 227   | 3186 | 4050  | 22154         | 4273           | ... |
|            | New Deaths    | 4         | 5     | 117  | 812   | 707           | 711            | ... |
| 2020-03-31 | New Cases     | 1587      | 146   | 3110 | 4053  | 26381         | 4515           | ... |
|            | New Deaths    | 1         | 3     | 141  | 837   | 1079          | 831            | ... |
| ...        | ...           | ...       | ...   | ...  | ...   | ...           | ...            | ... |
|            | ...           | ...       | ...   | ...  | ...   | ...           | ...            | ... |
| 2022-08-07 | New Cases     | 861       | 0     | 5477 | 26656 | 12601         | 0              | ... |
|            | New Deaths    | 0         | 0     | 63   | 74    | 31            | 98             | ... |
| ...        | ...           | ...       | ...   | ...  | ...   | ...           | ...            | ... |
|            | ...           | ...       | ...   | ...  | ...   | ...           | ...            | ... |

**Table S2.** Example COVID-19 hospitalization dataset. All other countries’ hospitalization data follows the same structure as shown in Table S2. But the hospitalizations’ data sources vary from country to country. The dataset source is U.S. HHS [60].

| Date       | Countries     |     |
|------------|---------------|-----|
|            | United States | ... |
| 2020-03-28 | 4509          | ... |
| 2020-03-29 | 5452          | ... |
| 2020-03-30 | 5275          | ... |
| 2020-03-31 | 5383          | ... |
| ...        | ...           | ... |
| 2022-08-07 | 5400          | ... |
| ...        | ...           | ... |

### 1.2 Internet Search Data Showcase

This section showcases the internet search data discussed in section 3.2. Specifically, Google Trends' [62] search queries' frequencies are displayed below for generic internet search data illustration. Table S3 displays the search frequencies of "Loss of Taste", obtained in daily frequencies in two U.S. states. Other time frames and geographical resolutions can be specified when retrieving a query of interest. For forecasting, as an example, "standing on" 2022-08-07, to produce 1-4 weeks ahead forecasts (2022-08-08 to 2022-09-04) for COVID-19 targets, one can use the below Google Trends' information up to 2022-08-07. The dimensionality of the internet search data depends on the number of selected queries of interest.

**Table S3.** Example Google Trends' dataset. All other geographical resolutions' search queries' frequencies are in similar data structure. The dataset source is Google Trends [62]. the ar

| Date       | United States |               |
|------------|---------------|---------------|
|            | Georgia       | California    |
|            | Loss of Taste | Loss of Taste |
| 2020-03-28 | 17.69         | 208.95        |
| 2020-03-29 | 167.59        | 278.81        |
| 2020-03-30 | 234.04        | 127.03        |
| 2020-03-31 | 9.66          | 147.87        |
| ...        | ...           | ...           |
| 2022-08-07 | 54.18         | 106.53        |

## 2. More Details on Forecsating Methods

### 2.1 More Details on Baseline LSTM Architecture

This section further demonstrates the baseline LSTM architecture that is incorporated by Ayyoubzadeh et al. [46] and Prasanth et al. [47]. The vanilla LSTM architecture is implemented using four gates: cell, input, forget and output gates. The working equations of the LSTM gates are shown as follows [77]:

$$f_t = \sigma(W_f[h_{t-1}, x_t] + b_f), \quad (1)$$

$$i_t = \sigma(W_i[h_{t-1}, x_t] + b_i), \quad (2)$$

$$o_t = \sigma(W_o[h_{t-1}, x_t] + b_o), \quad (3)$$

$$\tilde{c}_t = \sigma(W_c[h_{t-1}, x_t] + b_c), \quad (4)$$

$$c_t = f_t \odot c_{t-1} + i_t \odot \tilde{c}_{t-1}, \quad (5)$$

$$h_t = o_t \odot \tanh(c_t), \quad (6)$$

where  $f_t$  is the output of forget gate for time  $t$ ,  $h_{t-1}$  is the output of the hidden state vector form time  $t - 1$ ,  $i_t$  represents the input state at time  $t$ ,  $o_t$  represents the output state at time  $t$ ,  $c_t$  represents the output from the cell unit,  $W_i$ ,  $W_c$ ,  $W_f$  and  $W_o$  are the weight matrices associated with the input, cell unit, forget and output gates, while  $b_i$ ,  $b_c$ ,  $b_f$  and  $b_o$  are the bias vectors associated with input, cell unit, forget and output gates,  $\sigma$  represents the sigma activation function and  $\odot$  represents the Hadamard operation on two matrices. The architecture of the LSTM cell with all the gates and variables are also shown in Figure S1.

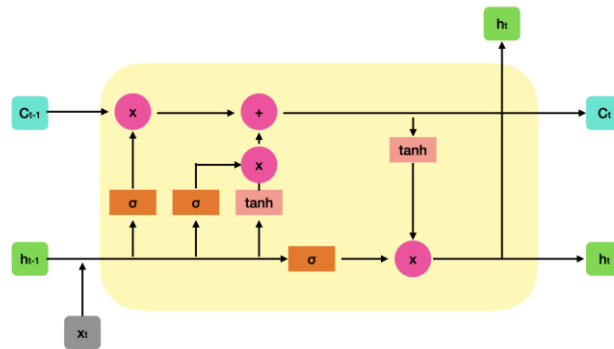

**Figure S1.** Illustration of the architecture of a baseline LSTM cell.

### 2.2 More Details on Statistical Models

This section further expands on the traditional statistical model structures for time series forecasting. In disease forecasting task, one of the most used linear based models is autoregressive moving average model (ARMA), and its variants, due to its simplicity and ex-

plainability. In this section, we briefly expand on an ARMA-like structure, AutoRegressive and Google search data (ARGO) [12], and its variant proposed for COVID-19 forecast by Ma and Yang [51]. Other variants of ARGO is proposed by Liu et al. [45], Wang et al. [52], and Ma et al. [53]. Consider the following forecasting scenario:

Let  $X_{j,t}$  be the Google Trends data of search term  $j$  on day  $t$ ;  $y_t$  be the COVID-19 target at day  $t$ . Inspired by ARGO method [12], Ma and Yang [51] proposed to combine the lagged COVID-19 target and internet search data for future COVID-19 target's predictions. Specifically, with information available as of time  $T$ , to estimate  $y_{T+l}$  for  $l > 0$ , the COVID-19 target on day  $(T + l)$ , an  $L_1$  regularized linear estimator is used:

$$\hat{y}_{T+l} = \hat{\mu}_y + \sum_{i=0}^l \hat{\alpha}_i y_{T-i} + \sum_{j=1}^J \hat{\beta}_j X_{j,t}$$

where one can use lagged COVID-19 target and latest Google search information. For  $l^{\text{th}}$  day ahead prediction, the coefficients  $\{\mu_y, (\alpha_0, \dots, \alpha_l), (\beta_1, \dots, \beta_J)\}$  can be obtained via

$$\underset{\mu_y, \alpha, \beta, \lambda}{\operatorname{argmax}} \sum_{t=T-N-l+1}^{T-l} \left( y_{t+l} - \mu_y - \sum_{i=0}^l \alpha_i y_{t-i} - \sum_{j=1}^J \beta_j X_{j,t} \right)^2 + \lambda_\alpha \|\alpha\|_1 + \lambda_\beta \|\beta\|_1$$

where  $N$  is the length of training period;  $l$  is the total lags of the COVID-19 target considered;  $J$  is the total number of relevant queries considered. One can set hyperparameters  $\lambda = (\lambda_\alpha, \lambda_\beta, \lambda_\delta, \lambda_\gamma)$  through cross-validation. For simplicity, Ma and Yang [51] suggest to constrain  $\lambda_\alpha = \lambda_\beta = \lambda_\delta = \lambda_\gamma$ . Ma and Yang [51] has detailly demonstrated that the  $L_1$  regularization term plays a crucial role in COVID-19 forecast, as it can robustly select the important queries among a large poll for accurate COVID-19 deaths' predictions in different geographical resolution. One can also include other exogenous variables and consider different lagging periods for various rapidly changing COVID-19 dynamics.

### 3. Accessibility of Selected Research Studies

Table S4 below detailly collects the data and code availabilities of all the selected research studies considered in this review paper. For those studies that do not have data or code availability stated in the manuscript, "N/A" is used. Table S4 provides a systematic look-up table to provide accessibility and reproducibility for the selected studies.

**Table S4.** Data and Code availabilities of the selected research studies in this review paper.

| Study                          | Data Availability                                                                                                                                                     | Code Availability                                                                                                                                                                                                       |
|--------------------------------|-----------------------------------------------------------------------------------------------------------------------------------------------------------------------|-------------------------------------------------------------------------------------------------------------------------------------------------------------------------------------------------------------------------|
| Liu et al. (2020) [45]         | Harvard Dataverse, DOI:<br><a href="https://doi.org/10.7910/DVN/MWMLDV">https://doi.org/10.7910/DVN/MWMLDV</a>                                                        | Harvard Dataverse, DOI:<br><a href="https://doi.org/10.7910/DVN/MWMLDV">https://doi.org/10.7910/DVN/MWMLDV</a>                                                                                                          |
| Ayyoubzadeh et al. (2020) [46] | N/A                                                                                                                                                                   | N/A                                                                                                                                                                                                                     |
| Prasanth et al. (2021) [47]    | N/A                                                                                                                                                                   | N/A                                                                                                                                                                                                                     |
| Rabiolo et al (2021) [48]      | Rabiolo A, Alladio E, Morales E, Marchese A. PredictPandemic.org. URL:<br><a href="https://predictpandemic.org">https://predictpandemic.org</a> [accessed 2022-11-12] | Rabiolo A, Alladio E, Morales E, Marchese A. PredictPandemic web-application. URL:<br><a href="https://zenodo.org/record/4603713#.YE4sfC2l28U">https://zenodo.org/record/4603713#.YE4sfC2l28U</a> [accessed 2022-11-12] |
| Lampos (2021) [49]             | <a href="https://figshare.com/projects/Tracking_COVID-19_using_online_search/81548">https://figshare.com/projects/Tracking_COVID-19_using_online_search/81548</a>     | N/A                                                                                                                                                                                                                     |

---

|                            |                                                                                                                           |                                                                                                                                                                                                                                                           |
|----------------------------|---------------------------------------------------------------------------------------------------------------------------|-----------------------------------------------------------------------------------------------------------------------------------------------------------------------------------------------------------------------------------------------------------|
| Turk et al. (2021)<br>[50] | Github Repository:<br><a href="https://github.com/philturk/CovCenVECM.git">https://github.com/philturk/CovCenVECM.git</a> | Github Repository:<br><a href="https://github.com/philturk/CovCenVECM.git">https://github.com/philturk/CovCenVECM.git</a>                                                                                                                                 |
| Ma and Yang (2022)<br>[51] | Harvard Dataverse, DOI:<br><a href="https://doi.org/10.7910/DVN/IBJS6X">https://doi.org/10.7910/DVN/IBJS6X</a>            | Github Repository:<br><a href="https://github.com/stevenmsm/COVID-19-Forecasts-Using-Internet-Search-Information-in-the-United-States.git">https://github.com/stevenmsm/COVID-19-Forecasts-Using-Internet-Search-Information-in-the-United-States.git</a> |
| Wang et al. (2022)<br>[52] | Harvard Dataverse, DOI:<br><a href="https://doi.org/10.7910/DVN/S7H0TD">https://doi.org/10.7910/DVN/S7H0TD</a>            | Harvard Dataverse, DOI:<br><a href="https://doi.org/10.7910/DVN/S7H0TD">https://doi.org/10.7910/DVN/S7H0TD</a>                                                                                                                                            |
| Ma et al (2022) [53]       | Harvard Dataverse, DOI:<br><a href="https://doi.org/10.7910/DVN/PGNBAX">https://doi.org/10.7910/DVN/PGNBAX</a>            | Github Repository:<br><a href="https://github.com/stevenmsm/Joint-COVID-19-and-Influenza-Forecasts-in-the-United-States.git">https://github.com/stevenmsm/Joint-COVID-19-and-Influenza-Forecasts-in-the-United-States.git</a>                             |

---
