# Supplementary material
Source: MDPI journal article supplement (https://www.mdpi.com/2813-2203/1/2/14)
Supplement: s1 [file s1]

Archive with 1 entries (1 files):
- analytics-1957305-supplementary.pdf
